# Supplementary material for: Estimation of relative oxygen metabolic activity microdistribution in biofilms based on the catastrophe point phenomenon during oxygen-infusion processes
Source: Royal Society of Chemistry journal article supplement (doi:10.1039/c7ay01773a), 2017-01-01
Supplement: c7ay01773a1.pdf [file c7ay01773a1.pdf]

## Supplementary Information

### Figures

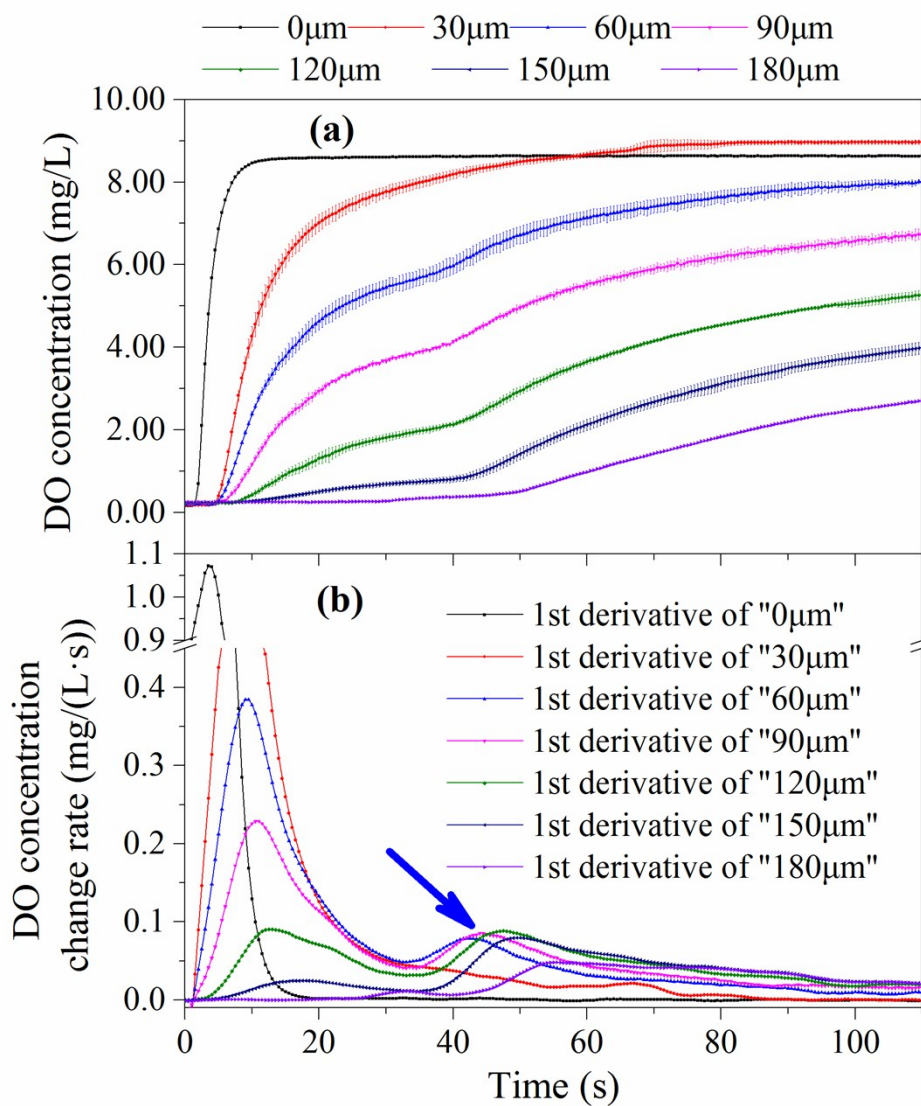

Fig. S1 (a) Oxygen-infuse processes in the active biofilm; (b) First-order derivatives of the DO concentrations in the active biofilm

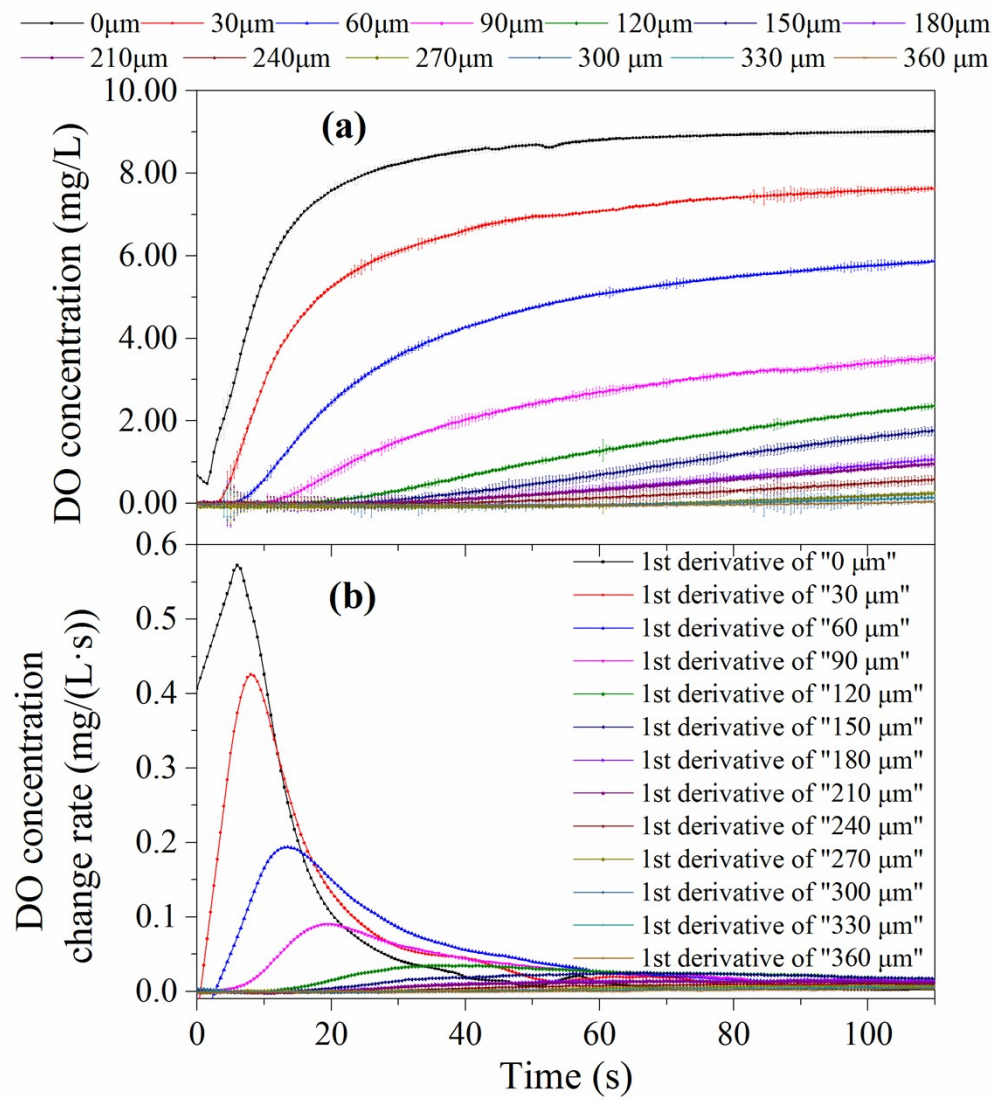

Fig. S2 (a) Oxygen-infuse processes in the inactive biofilm; (b) First-order derivatives of the DO concentrations in the inactive biofilm

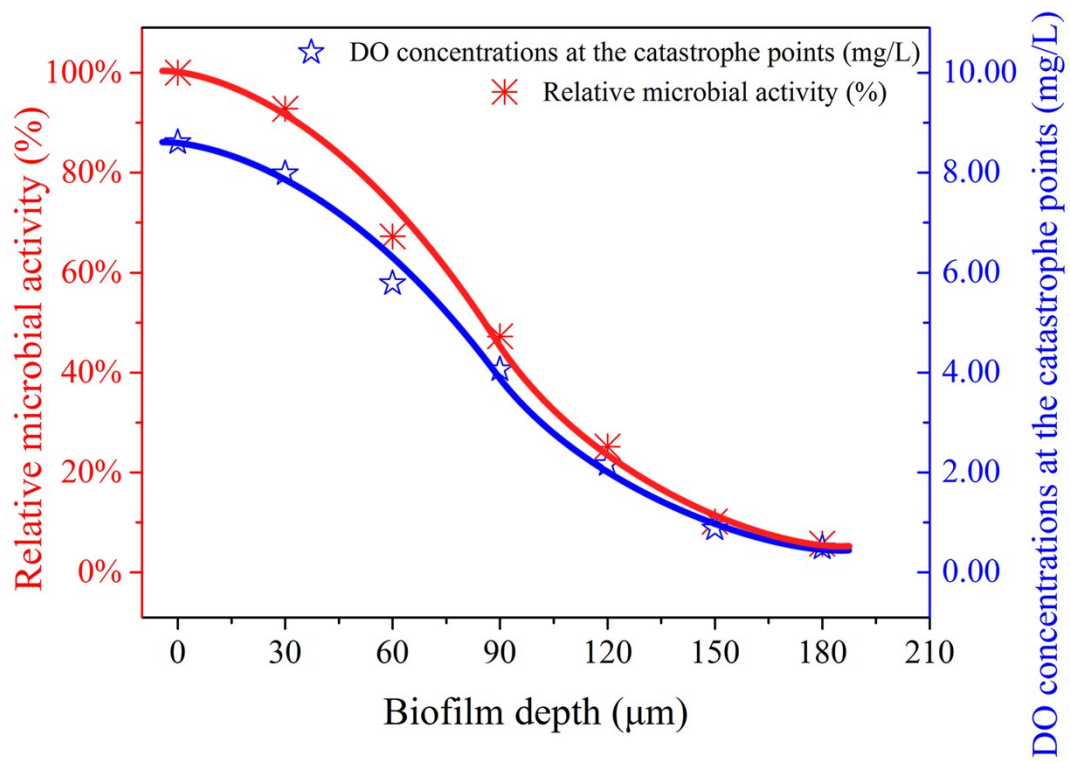

Fig. S3 DO concentrations at the catastrophe points and relative microbial oxygen metabolic activity microdistribution inside the active biofilm
